## Correction

# Correction: A Likelihood-Based Approach to Identifying Contaminated Food Products Using Sales Data: Performance and Challenges

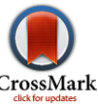

## The PLOS Computational Biology Staff

The author contributions of the manuscript are incorrect, the correct contributions are:

Conceived and designed the experiments: SE KH JK JL.

Performed the experiments: KH MF CT SE AH.

Analyzed the data: BA CT KH AH AK JL MF.

Contributed materials and analysis tools: SE AH KH JK CT JL.

Wrote the paper: SE KH JD MF JK JL.

Preprocessed/organized raw food sales data: CT MF BA AK.

Designed/wrote likelihood algorithm: SE JL.

Designed and performed clustering analysis: AH CT.

Proposed this use of retail data with public health data: MF JK.

## References

1. Kaufman J, Lessler J, Harry A, Edlund S, Hu K, et al. (2014) A Likelihood-Based Approach to Identifying Contaminated Food Products Using Sales Data: Performance and Challenges. *PLoS Comput Biol* 10(7): e1003692. doi:10.1371/journal.pcbi.1003692

**Citation:** The PLOS Computational Biology Staff (2014) Correction: A Likelihood-Based Approach to Identifying Contaminated Food Products Using Sales Data: Performance and Challenges. *PLoS Comput Biol* 10(11): e1003999. doi:10.1371/journal.pcbi.1003999

**Published:** November 3, 2014

**Copyright:** © 2014 The PLOS Computational Biology Staff. This is an open-access article distributed under the terms of the Creative Commons Attribution License, which permits unrestricted use, distribution, and reproduction in any medium, provided the original author and source are credited.
